# Supplementary material for: Solvent-Free Ring Cleavage Hydrazinolysis of Certain Biginelli Pyrimidines
Source: Hindawi journal article supplement (doi:10.1155/2018/6354742), 2018-01-01
Supplement: f1 [file 6354742.f1.docx]

**Graphical Abstract**

**Ring Opening Hydrazinolysis of Certain Biginelli Pyrimidines**

Mohamed A. Said1, Wagdy M. Eldehna2, Hazem A. Ghabbour3,4,*, Maha M. Kabil5, Nasser S. Al-shakliah3, Hatem A. Abdel-Aziz6

*1Department of Pharmaceutical Chemistry, Faculty of Pharmacy, Egyptian Russian University, Badr City,Cairo, Egypt*

*2Department of Pharmaceutical Chemistry, Faculty of Pharmacy, Kafrelsheikh University, Kafrelsheikh, Egypt*

*3Department of Pharmaceutical Chemistry, College of Pharmacy, King Saud University, P.O. Box 2457, Riyadh 11451, Saudi Arabia*

*4Department of Medicinal Chemistry, Faculty of Pharmacy, Mansoura University, Mansoura 35516, Egypt*

*5Department of Infection Control, King Saud University Medical City, Riyadh Saudi Arabia*

*6 Department of Applied Organic Chemistry, National Research Center, Dokki, Cairo 12622, Egypt*
